# Supplementary material for: Vasoactive intestinal peptide-expressing interneurons are impaired in a mouse model of Dravet syndrome
Source: eLife. 2019 Jul 8;8:e46846. doi: 10.7554/eLife.46846 (PMC6629374; doi:10.7554/eLife.46846)
Supplement: Figure 3—source data 1. [file elife-46846-fig3-data1.xlsx]

## Sheet: Sheet1
Recording_membrane_potential	Holding_Current	Vm	Input_Resistance	Membrane_time_constant	Rheobase	Inflection_rate	Max_rise_slope	ap_thresh_1	ap_amplitude	ap_peak	ap_rise_time	ap_10_90	ap_halfwidth	ahp1_amp	ahp1_time	sag	max_instantaneous	max_steady_state_firing	Rheobase_APs	ISI_CoV	Filename	Group
-68.4579	-2.89224	-67.2011	434.524	9.02416	29.4424	12.7494	459.595	-43.7561	82.8796	39.1235	0.43	0.18	0.4975	-11.8103	5.05	-0.160899	202.02	56.6667	1	0.371081	KG04cell4.abf	DR CA
-71.9074	-32.3634	-62.8899	278.633	9.59166	49.3135	10.8384	408.325	-43.0603	76.9043	33.844	0.45	0.195	0.4065	-15.1367	5.05	-0.221209	104.167	53.3333	1	0.181077	KG04cell7.abf	DR CA
-71.598	26.7284	-78.1737	246.022	4.25846	70.7798	9.82877	422.668	-42.5415	86.0291	43.4875	0.524	0.21	0.6278	-9.42993	1.7	-0.124002	58.6854	53.3333	1	0.134811	KG144cell1.abf	DR CA
-70.8779	0	-70.8779	474.579	4.79515	30	25.9873	392.151	-45.2118	83.8165	38.6047	0.47	0.222	0.6496	-14.4043	1.44	-0.107843	169.492	70	1	0.274249	KG144cell6.abf	DR CA
-66.9256	-21.4342	-56.3522	493.298	5.0079	30.2257	20.6991	512.695	-39.6973	96.1243	56.427	0.436	0.198	0.5602	-7.78198	1.44	-0.057252	250	50	2	0.851959	KG150cell1.abf	DR CA
-73.6417	-9.90417	-70.4892	318.307	6.59067	29.8589	6.23802	515.747	-45.0256	94.1895	49.1638	0.468	0.19	0.5512	-8.20923	1.38	-0.332238	268.817	93.3333	1	0.240794	KG150cell10.abf	DR CA
-70.9919	-45.5485	-62.8692	178.329	6.32248	70.6712	5.2275	535.584	-35.1685	86.9263	51.7578	0.448	0.17	0.429	-11.4136	1.12	-0.332728	276.243	80	2	0.377947	KG150cell5.abf	DR CA
-67.7832	-22.2817	-59.7083	362.398	3.58939	49.8285	10.1903	369.263	-34.4238	79.2542	44.8303	0.484	0.222	0.578	-10.4065	1.26	-0.191436	251.256	50	3	0.843757	KG150cell6.abf	DR CA
-71.5193	-9.35238	-69.1708	251.12	5.60896	70.4479	5.2275	485.23	-45.4224	89.8865	44.4641	0.468	0.194	0.4696	-8.57544	1.26	-0.233344	138.504	56.6667	1	0.472605	KG150cell7.abf	DR CA
-67.5198	4.10116	-69.3057	435.476	4.82848	29.8557	15.972	415.039	-42.9749	84.9976	42.0227	0.454	0.212	0.6136	-6.10352	1.46	-0.240449	273.224	80	1	0.193294	KG165cell1.abf	DR CA
-65.2702	1.85666	-65.9741	379.075	20.3621	29.8605	23.7967	320.435	-34.3933	80.5969	46.2036	0.524	0.266	0.6354	-12.6038	1.72	-0.12318	211.864	63.3333	1	0.298121	KG165cell2.abf	DR CA
-67.7816	-19.4292	-60.832	357.684	4.63114	49.8047	16.6373	315.857	-33.9417	73.7061	39.7644	0.494	0.242	0.6956	-8.88062	1.62	-0.120969	209.205	36.6667	3	0.643957	KG165cell4.abf	DR CA
-72.7935	-48.9228	-57.7075	308.363	9.38871	50.8213	17.3026	431.824	-33.2703	84.8755	51.6052	0.434	0.21	0.4666	-10.5286	1.18	-0.344815	245.098	76.6667	3	0.617898	KG169cell1.abf	DR CA
-67.9598	10.0595	-71.7999	381.736	6.34062	50.4552	13.3106	450.134	-46.5149	89.5752	43.0603	0.494	0.206	0.5382	-11.3525	1.32	-0.239045	204.082	70	2	0.298386	KG169cell3.abf	DR CA
-70.6117	-0.818091	-70.3588	309.052	5.27395	50.4129	15.8683	297.546	-38.4033	78.1677	39.7644	0.548	0.272	0.762	-10.6812	1.94	-0.127512	150.15	53.3333	1	0.228756	KG169cell5.abf	DR CA
-67.3397	-23.4929	-61.1289	264.369	5.58945	90.7438	10.0901	242.615	-30.896	65.1978	34.3018	0.568	0.284	0.8574	-4.08936	2.16	-0.108175	268.817	40	1	0.470076	KG173cell2.abf	DR CA
-71.9408	-55.7394	-52.2596	353.094	2.93511	30.7344	26.6133	393.677	-41.1377	87.3718	46.2341	0.464	0.228	0.619	-14.801	1.8	-0.189286	226.244	123.333	1	0.342045	KG173cell5.abf	DR CA
-70.3041	-56.8813	-61.8008	149.492	5.84209	172.169	32.907	187.683	-35.4614	58.1665	22.7051	0.592	0.314	0.8858	-6.5918	2.52	-0.477303	201.613	46.6667	1	0.25607	KG173cell6.abf	DR CA
-68.3502	-74.5598	-58.565	131.24	5.45714	151.369	13.9423	445.557	-37.5488	81.8298	44.281	0.428	0.19	0.5574	-12.0239	1.78	-0.378121	101.833	50	1	0.236975	KG173cell7.abf	DR CA
-68.546	-30.2965	-52.2193	538.899	16.7618	19.8994	41.2683	295.41	-43.2953	70.7611	27.4658	0.515	0.24	0.5595	-13.855	1.45	-0.097315	178.571	106.667	1	0.168589	KG17cell1.abf	DR CA
-63.7709	-6.08159	-60.6294	516.563	6.53564	29.9439	25.5779	277.71	-42.3645	74.2859	31.9214	0.554	0.284	0.7756	-7.38525	1.88	-0.0449666	161.29	53.3333	2	0.342054	KG180cell1.abf	DR CA
-71.3064	-85.0784	-54.5321	197.162	3.39723	70.6613	13.083	628.662	-44.3115	94.0857	49.7742	0.484	0.164	0.4362	-12.4817	0.98	-0.264892	303.03	90	1	0.243417	KG180cell5.abf	DR CA
-71.0124	-19.9472	-63.281	387.592	10.164	70.5144	13.4749	312.805	-39.6423	66.0706	26.4282	0.464	0.226	0.567	-6.5918	1.68	-0.0847374	183.15	63.3333	1	0.441505	KG182cell4.abf	DR CA
-72.1899	-1.19376	-71.413	650.84	19.9612	29.2726	40.8592	247.192	-42.868	68.6249	25.7568	0.545	0.28	0.6555	-5.21851	1.45	-0.153391	273.973	66.6667	4	0.507017	KG18cell2.abf	DR CA
-70.8793	-1.21268	-70.34	444.71	13.4036	39.9618	22.805	363.77	-39.0076	75.2014	36.1938	0.48	0.215	0.6355	-8.3313	1.65	-0.150625	327.869	96.6667	1	0.22976	KG18cell4.abf	DR CA
-69.7615	-15.8803	-63.7019	381.578	11.2882	59.8152	25.699	347.9	-37.1582	71.3989	34.2407	0.495	0.22	0.5855	-5.76782	1.45	-0.120447	240.964	40	2	0.443292	KG18cell6.abf	DR CA
-70.7615	-9.33597	-69.1011	177.853	6.52903	70.6379	15.8074	674.438	-47.2046	88.3728	41.1682	0.316	0.14	0.3288	-14.4958	0.8	-0.365304	308.642	93.3333	1	0.28621	KG192cell4.abf	DR CA
-66.4558	-22.4212	-59.1075	327.739	7.2542	49.8063	17.118	379.944	-39.5935	74.3225	34.729	0.408	0.204	0.4882	-6.7749	1.06	-0.351318	413.223	76.6667	5	0.532253	KG192cell6.abf	DR CA
-69.7409	-40.0865	-58.3807	283.393	12.6637	59.9607	60.3835	460.205	-42.3279	81.7261	39.3982	0.4	0.2	0.4295	-9.61304	4.95	-0.226409	202.02	83.3333	1	0.218872	KG25cell1.abf	DR CA
-70.8945	0.609894	-71.1759	461.312	12.1564	29.8785	9.78706	521.24	-44.9219	88.5315	43.6096	0.455	0.17	0.452	-13.3362	1.15	-0.0895327	333.333	100	1	0.273564	KG29cell4.abf	DR CA
-71.2922	-3.65067	-69.6085	461.202	13.7616	29.2883	34.0588	479.126	-42.9077	87.6465	44.7388	0.45	0.19	0.506	-14.74	1.35	-0.0539101	198.02	106.667	1	0.131423	KG33cell2.abf	DR CA
-67.6511	-3.42014	-65.2494	702.235	28.255	19.2716	22.3595	413.818	-38.1317	77.8046	39.6729	0.445	0.185	0.4835	-17.334	1.35	-0.0684202	165.289	80	1	0.235747	KG34cell2.abf	DR CA
-68.8482	-2.46997	-67.8489	404.581	11.9076	29.312	24.2675	361.328	-42.8711	75.4944	32.6233	0.43	0.205	0.574	-9.64355	1.4	-0.168076	270.27	96.6667	1	0.173605	KG42cell1.abf	DR CA
-69.9843	-9.12244	-66.5545	375.974	17.5614	29.2746	27.5123	321.045	-41.9189	65.3259	23.407	0.445	0.2	0.5285	-9.64355	1.25	-0.171567	256.41	60	1	0.318016	KG42cell3.abf	DR CA
-71.8343	-10.9256	-67.1212	431.381	13.6216	19.4465	7.85706	570.068	-44.1895	84.0759	39.8865	0.39	0.145	0.388	-13.1531	1	-0.177917	377.358	146.667	1	0.2199	KG42cell5.abf	DR CA
-72.6891	-8.50061	-69.2663	402.65	7.85271	29.8691	48.4508	444.031	-45.4254	84.7015	39.2761	0.414	0.202	0.5512	-11.0168	1.34	-0.14642	242.718	136.667	1	0.166873	KG54cell1.abf	DR CA
-69.3578	6.12185	-72.4063	497.977	3.85858	20.0022	18.7799	419.617	-38.678	82.6538	43.9758	0.442	0.208	0.51	-14.6179	1.34	-0.105903	222.222	83.3333	1	0.377681	KG81cell2.abf	DR CA
-69.2841	-0.0166626	-69.2802	234.462	7.06436	59.8353	27.1112	338.745	-42.1448	77.179	35.0342	0.464	0.23	0.5812	-6.83594	1.28	-0.155067	280.899	70	2	0.458359	KG82cell11.abf	DR CA
-70.9275	-0.0221069	-70.9219	254.361	3.82999	69.6334	14.6413	279.236	-43.158	69.4031	26.2451	0.514	0.252	0.7274	-2.62451	1.48	-0.159486	316.456	70	1	0.345931	KG82cell3.abf	DR CA
-70.9855	-18.2889	-64.915	331.924	6.24532	49.3952	10.3439	379.944	-36.2305	77.2766	41.0461	0.574	0.212	0.59	-15.2588	1.46	-0.145747	295.858	106.667	1	0.26284	KG82cell7.abf	DR CA
-71.0319	-28.5874	-64.4402	230.579	6.54147	70.0624	13.3106	553.894	-42.1204	90.155	48.0347	0.514	0.174	0.4786	-6.40869	1.22	-0.210243	400	106.667	1	0.241878	KG82cell9.abf	DR CA
-71.8118	-23.1828	-64.2876	324.561	6.71915	49.3931	1.53905	572.205	-42.9443	91.7419	48.7976	0.392	0.162	0.4132	-10.2234	1.04	-0.211538	364.964	76.6667	1	0.376486	KG83cell3.abf	DR CA
-71.2716	-17.3346	-65.2823	345.515	5.09089	49.3215	27.6495	410.461	-44.4794	76.4313	31.9519	0.39	0.188	0.4962	-7.32422	1.28	-0.151594	299.401	70	1	0.4741	KG83cell6.abf	DR CA
-73.8038	-24.4034	-64.1527	395.482	20.7278	39.1757	39.0456	238.037	-36.9873	56.366	19.3787	0.5	0.235	0.584	-8.42285	1.6	-0.187142	215.054	0	2	0.443717	KG04cell1.abf	DR IS
-69.9245	-23.1771	-60.6164	401.607	12.3891	29.4229	22.7351	446.777	-41.0339	82.1716	41.1377	0.415	0.18	0.413	-12.6038	1.15	-0.224835	169.492	30	1	0.913367	KG04cell6.abf	DR IS
-72.4127	-10.8129	-69.8838	233.874	8.29359	50.4183	21.0007	364.685	-45.639	71.0602	25.4211	0.45	0.204	0.5914	-8.14819	1.38	-0.669147	166.113	10	4	0.793502	KG144cell3.abf	DR IS
-68.6548	-6.64532	-66.5117	322.507	6.21707	60.5101	5.2275	524.902	-39.502	81.8298	42.3279	0.448	0.164	0.4282	-12.2986	1.14	-0.11765	259.067	3.33333	1	0.447559	KG144cell4.abf	DR IS
-70.3798	-26.9352	-63.0336	272.737	7.56639	70.559	9.82877	425.72	-34.4543	79.7424	45.2881	0.464	0.194	0.517	-14.4043	1.32	-0.297566	130.89	10	1	0.603082	KG144cell5.abf	DR IS
-71.0807	-57.4365	-58.9316	211.522	6.32247	70.4508	20.4823	434.875	-41.1682	84.8999	43.7317	0.444	0.208	0.4458	-7.8125	1.08	-0.854675	231.481	13.3333	4	0.931322	KG150cell2.abf	DR IS
-69.9812	-5.2427	-68.897	206.799	7.45444	90.7396	12.6453	541.687	-43.1885	90.8569	47.6685	0.434	0.174	0.4678	-7.99561	1.12	-0.20137	263.158	50	1	0.404807	KG150cell3.abf	DR IS
-71.5854	-47.153	-62.8362	185.548	5.56737	111.213	17.1678	451.66	-43.396	84.0149	40.6189	0.424	0.196	0.4398	-10.7422	1.1	-0.120469	248.756	46.6667	1	0.671108	KG150cell8.abf	DR IS
-74.2468	-49.7483	-60.506	276.206	6.36434	50.6106	7.10104	398.254	-37.8845	78.2288	40.3442	0.468	0.202	0.4686	-14.8315	1.24	-0.506731	151.515	26.6667	4	0.509992	KG150cell9_2.abf	DR IS
-74.449	-6.12156	-71.481	484.844	10	29.8781	27.1112	283.813	-44.4031	68.2068	23.8037	0.504	0.254	0.6484	-0.396729	1.44	-0.172765	259.067	40	5	0.788097	KG165cell5.abf	DR IS
-69.6661	-32.534	-54.4274	468.394	4.90579	30.204	12.0162	396.729	-43.1946	81.4636	38.269	0.448	0.216	0.4486	-16.6321	1.22	-0.209289	162.866	26.6667	1	0.743353	KG165cell6.abf	DR IS
-69.6353	22.8929	-75.5654	259.033	6.03055	50.8177	31.81	215.149	-40.9058	65.0146	24.1089	0.582	0.306	0.731	-9.94873	1.78	-0.0580209	127.877	33.3333	1	0.389317	KG165cell7.abf	DR IS
-71.2767	2.39091	-72.0404	319.405	5.44907	70.4873	30.3997	251.77	-42.4316	63.8245	21.3928	0.538	0.266	0.8154	-7.04956	2.6	-0.16621	193.05	26.6667	1	0.438052	KG169cell2.abf	DR IS
-74.4632	-17.8586	-66.4922	446.337	7.19778	50.4245	21.0557	271.606	-37.7136	67.2852	29.5715	0.516	0.258	0.7036	-3.41797	1.68	-0.162795	259.067	53.3333	4	0.522787	KG169cell4.abf	DR IS
-71.0773	-77.2773	-60.9985	130.424	7.30459	151.425	17.1678	418.091	-35.3088	83.0688	47.76	0.424	0.202	0.5074	-8.39233	1.38	-0.469545	89.4454	53.3333	1	0.41951	KG173cell1.abf	DR IS
-69.7922	-14.2534	-61.9057	553.304	4.93223	29.8756	19.6296	282.288	-34.3567	71.2524	36.8958	0.516	0.256	0.692	-13.7329	1.9	-0.070328	147.059	60	1	0.506305	KG173cell3.abf	DR IS
-68.7437	-39.9382	-60.2057	213.782	9.02499	70.4606	17.118	462.341	-40.9668	82.5012	41.5344	0.388	0.184	0.4274	-8.66699	0.98	-0.304965	352.113	46.6667	1	0.785124	KG173cell4.abf	DR IS
-69.7881	12.8182	-72.2778	194.233	5.29567	131.454	34.7047	314.941	-36.8561	65.7562	28.9001	0.465	0.225	0.5955	-15.9912	5	-0.140705	128.205	26.6667	1	0.478939	KG17cell2.abf	DR IS
-70.0321	-32.3463	-59.3245	331.028	13.9796	49.4328	35.3377	427.246	-39.7949	76.9348	37.1399	0.4	0.19	0.4425	-15.3809	1.35	-0.12694	243.902	16.6667	1	1.27089	KG17cell3.abf	DR IS
-71.6673	-57.373	-61.4545	178.007	10.4338	120.836	22.0268	394.287	-34.5184	78.952	44.4336	0.455	0.215	0.6065	-9.58252	1.95	-0.0635348	147.059	50	1	0.319681	KG17cell5.abf	DR IS
-70.1815	-27.4658	-59.9336	373.115	15.8624	49.4316	29.5825	327.148	-30.4565	69.0918	38.6353	0.48	0.215	0.469	-10.4065	1.2	-0.190124	270.27	0	3	0.615015	KG17cell6.abf	DR IS
-68.1136	-43.928	-42.7706	576.921	10	50.6341	8.97457	410.461	-42.0349	77.0081	34.9731	0.448	0.206	0.559	-11.8408	1.56	-0.38936	60.6796	26.6667	1	0.301533	KG180cell2.abf	DR IS
-74.801	-13.554	-71.4923	244.114	10.6281	30.0238	31.1078	329.59	-42.0349	69.8364	27.8015	0.438	0.23	0.4852	-12.0544	1.28	-0.578338	196.85	46.6667	2	1.0671	KG180cell3.abf	DR IS
-69.8049	-60.2061	-60.9643	146.839	5.72385	111.397	30.8246	257.874	-32.4524	52.2888	19.8364	0.418	0.214	0.4528	-14.3433	1.3	-0.796633	170.648	0	1	0.800111	KG180cell4.abf	DR IS
-72.5467	-45.1839	-58.2612	316.163	6.4394	50.3974	23.7967	294.495	-41.5955	75.5615	33.9661	0.524	0.272	0.727	-8.36182	2	-0.0924088	115.207	36.6667	1	0.310784	KG180cell6.abf	DR IS
-69.7122	-21.7773	-63.3319	292.978	2.94997	90.5349	40.406	372.314	-47.0398	80.9448	33.905	0.462	0.234	0.548	-13.1531	1.2	-0.26707	74.4048	20	1	0.823559	KG182cell2_2.abf	DR IS
-72.0304	-19.6816	-63.119	452.778	8.3915	29.861	13.083	402.832	-43.6401	72.3572	28.717	0.424	0.194	0.5456	-9.3689	1.58	-0.130473	105.485	43.3333	1	0.252601	KG182cell3_2.abf	DR IS
-68.8684	-18.7567	-62.773	324.968	5.61279	49.8068	24.7782	308.228	-38.0676	59.6436	21.5759	0.398	0.2	0.493	-6.53076	1.24	-0.312802	255.102	13.3333	4	1.16521	KG182cell5.abf	DR IS
-67.6003	-11.9854	-63.3417	355.312	6.49572	49.9373	31.9809	241.089	-38.5254	55.2795	16.7542	0.462	0.238	0.5996	-5.49316	1.44	-0.385499	282.486	0	5	0.681892	KG182cell6.abf	DR IS
-70.9991	-34.4993	-59.2614	340.229	19.6202	49.1806	16.595	296.021	-33.2062	60.9161	27.71	0.485	0.215	0.5135	-10.2234	1.35	-0.413099	227.273	23.3333	3	0.637394	KG18cell5.abf	DR IS
-73.0599	-0.493994	-72.841	443.071	4.25023	29.8646	25.0307	184.631	-34.314	45.6055	11.2915	0.478	0.252	0.6448	-6.40869	1.62	-0.413869	242.718	0	4	0.531855	KG192cell1.abf	DR IS
-73.0599	-0.493994	-72.841	443.071	4.25023	29.8646	25.0307	184.631	-34.314	45.6055	11.2915	0.478	0.252	0.6448	-6.40869	1.62	-0.413869	242.718	0	4	0.531855	KG192cell2.abf	DR IS
-67.5445	-18.0579	-60.4443	393.186	3.65577	30.0425	26.6133	373.84	-43.3655	67.7795	24.4141	0.384	0.184	0.4956	-6.95801	1.16	-0.369135	290.698	50	5	1.19856	KG192cell7.abf	DR IS
-68.031	-24.3246	-60.6913	301.737	4.05015	49.7993	23.3287	347.9	-33.6914	72.0215	38.3301	0.444	0.218	0.643	-13.9465	2.16	-0.170842	179.211	26.6667	3	0.883676	KG192cell9_2.abf	DR IS
-70.0856	-65.557	-61.36	133.099	8.24034	160.679	23.5997	383.301	-37.1704	74.3103	37.1399	0.475	0.205	0.5875	-11.9629	5.05	-0.124894	289.855	26.6667	1	1.22383	KG25cell3.abf	DR IS
-69.8126	-18.8419	-65.823	211.74	8.90845	90.1504	30.0334	404.663	-40.0391	78.0334	37.9944	0.42	0.2	0.535	-8.36182	1.55	-0.139496	229.885	33.3333	1	0.73353	KG25cell4.abf	DR IS
-70.9661	-12.3164	-65.9117	410.378	12.7319	29.3712	21.7442	383.301	-45.1904	81.9946	36.8042	0.47	0.22	0.5175	-11.5051	1.35	-0.232737	158.73	33.3333	1	0.651839	KG29cell1.abf	DR IS
-69.3687	-8.78879	-66.171	363.841	15.7996	39.2741	23.7156	297.852	-36.1328	58.1055	21.9727	0.405	0.195	0.4045	-16.6016	1.2	-0.246648	210.526	0	1	0.191573	KG29cell2.abf	DR IS
-69.9304	-7.72659	-67.6749	291.908	13.709	39.3929	8.6188	294.8	-39.566	66.3605	26.7944	0.485	0.225	0.3865	-19.5312	0.9	-0.548354	307.692	6.66667	4	0.354189	KG29cell3.abf	DR IS
-69.5911	-37.2363	-62.3024	195.74	17.2072	70.0614	37.2463	338.135	-35.1562	65.5212	30.365	0.41	0.2	0.4175	-11.4746	1.25	-0.410851	222.222	0	1	0.0604192	KG29cell5.abf	DR IS
-71.38	-7.70981	-67.7626	469.194	18.859	39.4257	27.4182	399.78	-39.4409	77.6184	38.1775	0.44	0.205	0.4335	-10.3149	1.1	-0.0507095	281.69	6.66667	3	0.868208	KG29cell6.abf	DR IS
-69.2464	-7.98523	-66.7498	312.648	13.8833	80.0114	24.9483	466.309	-43.5059	75.3052	31.7993	0.395	0.165	0.3475	-14.679	0.85	-0.198105	294.118	13.3333	1	0.884108	KG29cell7.abf	DR IS
-69.165	-44.3254	-56.8116	278.698	13.4522	69.9066	38.3564	239.258	-39.9078	53.0304	13.1226	0.415	0.22	0.409	-13.9465	1.05	-0.370267	206.186	10	1	0.943877	KG33cell3.abf	DR IS
-68.9413	-29.9324	-62.5795	212.538	15.0838	69.6228	64.808	408.325	-41.4368	73.938	32.5012	0.395	0.195	0.3705	-15.5029	1.1	-0.500843	259.74	13.3333	2	1.38525	KG34cell3.abf	DR IS
-71.4468	-3.05417	-69.6799	578.525	18.1683	29.2826	21.1804	396.729	-43.1061	75.5463	32.4402	0.445	0.205	0.443	-12.3596	1.1	-0.16981	217.391	20	2	1.32297	KG34cell5.abf	DR IS
-70.118	-23.4953	-62.4637	325.778	31.1884	39.3271	14.2194	449.829	-39.9109	85.26	45.3491	0.435	0.195	0.436	-11.9019	1.1	-0.579953	206.186	16.6667	6	0.920241	KG34cell6.abf	DR IS
-69.9377	-19.3856	-66.0748	199.265	11.1359	79.9596	13.8712	481.567	-38.7543	84.256	45.5017	0.415	0.18	0.4265	-14.1907	1.15	-0.098153	173.913	23.3333	1	0.964028	KG34cell7.abf	DR IS
-69.3025	-32.3456	-57.872	353.384	22.49	39.6183	28.5361	397.949	-37.9395	75.3845	37.4451	0.43	0.195	0.4835	-7.41577	1.15	-0.165477	202.02	26.6667	2	0.401782	KG42cell2.abf	DR IS
-70.2599	-20.9309	-64.776	262	18.8922	49.0071	38.4522	458.374	-39.3677	78.3997	39.032	0.41	0.18	0.4725	-8.81958	1.35	-0.201209	68.4932	30	1	0.401897	KG42cell6.abf	DR IS
-70.6141	-20.8083	-64.1105	312.553	17.2953	39.1221	25.8082	458.374	-40.4938	72.0184	31.5247	0.365	0.16	0.353	-10.8032	0.85	-0.385629	350.877	40	5	1.43688	KG42cell7.abf	DR IS
-71.5339	-14.0036	-68.1035	244.966	15.0197	69.985	13.8292	449.829	-34.3567	67.804	33.4473	0.385	0.16	0.328	-16.4185	0.85	-0.304978	281.69	0	1	0.546302	KG42cell8.abf	DR IS
-70.3931	-16.7366	-66.8483	211.8	7.14074	60.5001	15.298	282.288	-32.7209	53.9917	21.2708	0.394	0.192	0.4234	-17.395	1.1	-0.553068	47.619	0	1	0.153223	KG54cell2.abf	DR IS
-68.7732	-2.9631	-67.7073	359.727	10.9591	30.0203	25.3719	323.486	-40.5762	62.7014	22.1252	0.388	0.196	0.4152	-13.031	1.04	-0.234131	159.744	0	1	0.197865	KG54cell5.abf	DR IS
-69.665	-0.577881	-69.465	346.094	11.2517	40.4625	30.4057	416.565	-36.2976	71.7285	35.4309	0.378	0.18	0.4512	-7.75147	1.16	-0.263263	90.0901	6.66667	1	0.551422	KG58cell1.abf	DR IS
-69.6329	-27.4686	-61.0251	313.369	9.32581	40.006	23.2141	320.435	-37.8845	62.2681	24.3835	0.402	0.198	0.4802	-9.552	1.16	-0.369002	165.563	0	3	0.699122	KG58cell2.abf	DR IS
-67.139	-0.526465	-66.8919	469.402	7.65086	29.8733	13.1599	428.772	-38.3118	73.0713	34.7595	0.388	0.174	0.4594	-10.1318	1	-0.136286	280.899	26.6667	2	1.38791	KG58cell3.abf	DR IS
-70.1455	-0.591565	-69.9863	269.088	10.0799	40.4521	14.0594	387.573	-39.5264	62.262	22.7356	0.334	0.164	0.3196	-17.2119	0.74	-0.589109	255.102	10	2	1.38848	KG58cell5.abf	DR IS
-69.186	-10.4943	-65.3051	369.81	10.2639	29.8701	23.0552	415.039	-42.0654	69.4092	27.3438	0.348	0.18	0.3768	-9.3689	0.86	-0.253205	349.65	13.3333	3	0.742415	KG73cell3.abf	DR IS
-70.7697	-26.0261	-63.3426	285.373	4.39992	59.8635	40.1498	268.555	-38.0371	58.2092	20.1721	0.452	0.22	0.6122	-8.05664	1.88	-0.0515948	147.059	20	1	0.974246	KG73cell4.abf	DR IS
-70.7457	-14.6718	-65.4245	362.684	9.29249	39.0934	8.16408	531.006	-42.4011	87.0178	44.6167	0.388	0.166	0.4102	-8.05664	1.08	-0.205111	320.513	50	3	0.726351	KG81cell3.abf	DR IS
-69.3364	-67.1601	-57.9455	169.609	8.54571	70.1926	14.6787	531.006	-39.0076	82.6172	43.6096	0.354	0.16	0.3182	-12.6343	0.72	-0.565843	378.788	23.3333	6	0.614732	KG81cell4.abf	DR IS
-70.1517	-31.2632	-60.3061	314.926	4.98873	39.2705	10.9631	497.437	-40.8997	77.7039	36.8042	0.394	0.158	0.2894	-20.874	0.66	-0.326044	344.828	103.333	2	1.0125	KG81cell5.abf	DR IS
-68.4291	-0.0231445	-68.4233	251.708	10.7202	49.7378	30.0231	424.194	-39.9292	82.5317	42.6025	0.418	0.198	0.499	-8.11768	1.32	-0.176044	83.4725	20	1	0.558654	KG82cell4.abf	DR IS
-70.6066	-43.9067	-60.7299	224.949	6.98232	90.8689	13.3106	387.573	-37.146	77.063	39.917	0.434	0.202	0.4422	-15.0146	1.2	-0.23699	76.6871	40	1	0.520264	KG82cell6.abf	DR IS
-69.8171	-13.5769	-64.8246	367.717	7.8695	19.1429	20.4823	486.755	-43.0603	88.1653	45.105	0.404	0.186	0.4306	-7.8125	0.94	-0.154714	161.812	56.6667	1	0.289411	KG83cell1.abf	DR IS
-71.9427	-6.65228	-69.828	317.884	2.58468	39.4545	6.23802	651.55	-46.0632	91.3208	45.2576	0.368	0.14	0.3276	-11.9934	0.74	-0.107221	403.226	63.3333	2	0.686838	KG83cell4.abf	DR IS
-76.4199	-2.42224	-75.3791	429.679	21.9479	29.3446	15.0205	435.791	-44.5709	81.9855	37.4146	0.445	0.2	0.6075	-9.8877	1.8	-0.0490247	58.1395	36.6667	1	0.282529	KG08cell6.abf	WT CA
-70.6603	2.45322	-71.9207	513.74	13.4012	19.9941	22.2066	382.69	-40.3259	74.0479	33.7219	0.44	0.21	0.4875	-17.9749	1.35	-0.0949773	135.135	60	1	0.233711	KG12cell3.abf	WT CA
-66.3577	-20.3781	-55.0184	556.444	7.30809	29.8244	31.4737	337.219	-45.1416	66.687	21.5454	0.448	0.208	0.6108	-7.96509	1.76	-0.0818628	263.158	103.333	1	0.163064	KG13cell2.abf	WT CA
-68.4747	-11.8975	-61.0064	627.717	6.17013	20.0059	19.6296	433.35	-38.1409	81.8115	43.6707	0.436	0.198	0.464	-16.6321	1.28	-0.160393	219.298	96.6667	1	0.177828	KG145cell1.abf	WT CA
-71.2548	14.8101	-77.2472	404.62	13.4057	30.669	19.9861	318.909	-37.1948	73.4497	36.2549	0.476	0.232	0.5754	-13.9465	1.6	-0.0393485	140.845	63.3333	1	0.217379	KG145cell2.abf	WT CA
-71.1448	-30.344	-62.6905	278.613	3.68857	80.5734	11.5824	569.153	-40.3503	89.0259	48.6755	0.394	0.164	0.482	-7.78198	1.42	-0.214074	285.714	70	1	0.248186	KG145cell3.abf	WT CA
-71.5904	0.407031	-71.7438	376.911	6.29414	29.8623	10.0901	415.039	-42.2485	85.5225	43.2739	0.508	0.218	0.7382	-6.92749	2.02	-0.0781875	160.772	66.6667	1	0.23341	KG145cell4.abf	WT CA
-69.7881	-0.683264	-69.5372	367.236	12.2165	40.4518	8.97457	495.911	-38.6475	89.4897	50.8423	0.448	0.188	0.5806	-12.2375	1.48	-0.0794725	210.084	60	1	0.301237	KG145cell6.abf	WT CA
-71.4275	-23.9904	-66.8164	192.202	3.62241	131.391	23.7967	303.65	-39.3982	72.1436	32.7454	0.524	0.254	0.7456	-0.854492	1.78	-0.0957604	259.067	53.3333	1	0.453325	KG162cell1.abf	WT CA
-72.513	-13.9617	-67.8497	334.005	5.84807	50.611	10.9631	456.238	-42.6697	82.7393	40.0696	0.414	0.184	0.454	-11.5967	1.1	-0.350237	261.78	120	1	0.192027	KG162cell2.abf	WT CA
-74.5354	-8.64102	-70.2779	492.717	8.88764	29.9802	27.512	241.089	-43.4998	64.5569	21.0571	0.562	0.282	0.8896	-0.396729	1.9	-0.0579662	225.225	46.6667	2	0.568532	KG163cell10.abf	WT CA
-69.1482	15.1479	-73.9499	316.986	7.67742	50.5884	10.0901	457.764	-43.6218	87.5366	43.9148	0.488	0.21	0.6118	-10.498	1.56	-0.103321	194.553	73.3333	1	0.270713	KG163cell3.abf	WT CA
-72.0891	5.68339	-73.6298	271.078	5.456	70.8395	10.8481	369.263	-42.157	81.1584	39.0015	0.508	0.232	0.6894	-7.56836	1.48	-0.129758	267.38	60	2	0.340909	KG163cell7.abf	WT CA
-75.3239	-8.28916	-71.1178	507.428	4.65412	29.9259	30.3903	312.805	-39.4287	73.761	34.3323	0.532	0.25	0.7716	-8.81958	2.02	-0.042772	179.856	46.6667	1	0.598757	KG163cell9.abf	WT CA
-66.8721	-19.6013	-59.3023	386.191	8.77631	49.7859	23.3586	260.925	-33.7646	68.158	34.3933	0.562	0.282	0.644	-13.1836	1.68	-0.0586695	183.824	46.6667	2	0.634381	KG164cell3.abf	WT CA
-72.0395	-2.87318	-71.3581	237.161	7.13952	70.4502	13.8533	552.368	-45.5933	97.3816	51.7883	0.424	0.188	0.4686	-8.48389	1.18	-0.1558	263.158	70	1	0.351288	KG164cell4.abf	WT CA
-67.3994	-49.4897	-59.5805	157.99	6.71939	90.6835	12.4933	491.333	-40.6189	92.6208	52.002	0.49	0.2	0.5415	-9.3689	1.45	-0.46466	200	40	1	0.401505	KG168cell4.abf	WT CA
-71.1259	-15.7353	-65.3296	368.364	17.216	39.8408	34.1577	314.941	-38.0157	81.1981	43.1824	0.565	0.265	0.6895	-7.69043	1.95	-0.105652	198.02	73.3333	1	0.313524	KG168cell5.abf	WT CA
-71.9546	-17.2438	-67.4416	261.715	8.72149	50.3964	15.3066	439.453	-37.6648	89.9109	52.2461	0.454	0.214	0.5362	-9.3689	1.48	-0.283908	226.244	73.3333	1	0.2885	KG168cell6.abf	WT CA
-67.9779	-27.2848	-57.5939	380.578	7.31975	49.8208	13.9423	375.366	-40.1733	76.7029	36.5295	0.468	0.214	0.56	-9.3689	1.46	-0.244208	209.205	70	3	0.391632	KG168cell7.abf	WT CA
-67.4009	3.83611	-68.6098	315.128	8.54394	50.4484	27.512	299.072	-37.5793	74.0479	36.4685	0.502	0.25	0.6266	-12.3291	1.62	-0.129109	131.579	60	1	0.476411	KG170cell1.abf	WT CA
-72.8646	-29.3988	-62.7186	345.115	6.12552	49.815	17.1678	312.805	-35.8582	72.876	37.0178	0.484	0.238	0.674	-9.15527	1.6	-0.158346	193.798	66.6667	1	0.604974	KG170cell4.abf	WT CA
-70.184	-4.64346	-67.6583	543.919	5.42062	29.8594	23.3287	350.952	-38.9709	74.0051	35.0342	0.444	0.216	0.6092	-12.9089	5	-0.0513266	220.264	73.3333	1	0.22533	KG170cell6.abf	WT CA
-68.2834	8.59678	-70.8026	293.039	4.43762	70.5099	21.3647	535.584	-45.813	90.6738	44.8608	0.394	0.184	0.4438	-3.54004	1.16	-0.181598	352.113	76.6667	1	0.261487	KG172cell1.abf	WT CA
-72.1271	-47.2144	-58.9369	279.369	10	70.4595	16.7595	263.977	-30.3955	63.5071	33.1116	0.524	0.256	0.7562	-9.46045	1.86	-0.259368	245.098	73.3333	1	0.189899	KG172cell2.abf	WT CA
-71.4191	-28.8791	-65.1582	216.799	4.87263	70.677	36.1028	436.401	-48.3582	90.4724	42.1143	0.468	0.23	0.5732	-9.09424	1.52	-0.232081	220.264	73.3333	1	0.268679	KG172cell5.abf	WT CA
-70.3577	-24.1946	-59.8554	434.078	9.50832	30.0449	14.6413	376.892	-38.0615	70.8069	32.7454	0.434	0.198	0.5622	-10.498	1.42	-0.294399	190.84	90	2	0.239458	KG183cell1.abf	WT CA
-70.3577	-24.1946	-59.8554	434.078	9.50832	30.0449	14.6413	376.892	-38.0615	70.8069	32.7454	0.434	0.198	0.5622	-10.498	1.42	-0.294399	190.84	90	2	0.239458	KG183cell2.abf	WT CA
-68.0056	-28.8124	-60.2436	269.397	6.57641	49.9253	13.9423	463.867	-39.6545	84.5154	44.8608	0.428	0.202	0.4818	-9.8877	1.12	-0.297874	167.224	56.6667	2	0.521237	KG183cell4.abf	WT CA
-72.0386	-15.8139	-68.187	243.555	5.37974	90.5441	13.976	358.582	-44.3481	74.53	30.1819	0.474	0.22	0.6398	-2.50244	1.46	-0.114459	304.878	53.3333	1	0.406942	KG183cell6.abf	WT CA
-68.8507	-12.2336	-65.7215	255.787	4.23497	90.7104	39.6417	277.71	-37.3688	67.0624	29.6936	0.534	0.26	0.771	-9.21631	2.06	-0.0973081	160.772	63.3333	1	0.180748	KG183cell7.abf	WT CA
-69.101	-13.7312	-65.5028	262.051	10	70.4482	25.9873	321.96	-37.3077	72.525	35.2173	0.49	0.238	0.6636	-8.17871	1.7	-0.0987814	143.266	53.3333	1	0.280358	KG183cell8.abf	WT CA
-68.066	-27.2389	-57.0307	405.129	11.0871	49.7978	27.512	274.658	-39.3799	66.2659	26.886	0.502	0.264	0.5868	-8.81958	1.3	-0.0726787	236.967	86.6667	5	0.318665	KG183cell9.abf	WT CA
-68.2641	-19.6288	-61.9738	320.465	9.44544	49.7092	31.9809	360.107	-39.1968	75.7568	36.5601	0.482	0.232	0.5754	-11.8713	1.58	-0.512912	115.741	56.6667	1	0.491689	KG184cell1.abf	WT CA
-72.7845	3.17433	-74.045	397.081	4.75501	30.6171	19.934	376.892	-37.4512	79.5349	42.0837	0.474	0.228	0.5942	-13.4277	4.82	-0.0760149	138.889	60	1	0.375274	KG184cell6.abf	WT CA
-65.8369	3.34836	-67.1101	380.25	4.079	29.9889	11.1808	447.083	-38.3728	83.4778	45.105	0.428	0.196	0.5162	-13.2141	1.4	-0.119025	255.102	86.6667	1	0.332106	KG185cell2.abf	WT CA
-71.1506	-24.0192	-65.4833	235.947	9.61036	70.6454	0.870237	430.298	-42.5476	86.1267	43.5791	0.532	0.214	0.551	-9.39941	1.26	-0.184816	224.215	50	1	0.266878	KG185cell5.abf	WT CA
-71.465	-42.0695	-60.9638	249.616	5.14772	50.3408	20.0441	416.565	-41.9006	85.8154	43.9148	0.464	0.222	0.5336	-13.4277	1.26	-0.16772	179.856	56.6667	1	0.258896	KG185cell6.abf	WT CA
-71.2599	-4.58308	-69.9721	281.006	9.67392	50.4539	10.3439	509.644	-42.5781	83.3801	40.802	0.414	0.176	0.4306	-12.6343	1.02	-0.389126	264.55	106.667	4	0.280039	KG185cell8.abf	WT CA
-67.8097	-27.4593	-59.9643	285.707	3.92067	70.5069	33.7401	427.246	-37.7808	89.4775	51.6968	0.484	0.236	0.6924	-11.322	1.92	-0.0693824	154.321	63.3333	1	0.14738	KG189cell3.abf	WT CA
-67.4282	-7.44011	-65.1738	303.007	7.45038	70.6292	9.20178	511.169	-39.2273	91.9312	52.7039	0.448	0.198	0.5564	-11.0474	1.48	-0.0720901	206.612	70	1	0.200042	KG189cell6.abf	WT CA
-71.7151	-44.1779	-58.4697	299.819	4.63895	70.6548	21.7687	294.495	-40.4297	68.4753	28.0457	0.496	0.246	0.7254	-9.00269	1.94	-0.262856	176.678	60	1	0.379526	KG189cell7.abf	WT CA
-66.5678	2.49287	-67.4919	370.708	4.84821	50.5188	23.3287	408.936	-36.6821	85.1135	48.4314	0.484	0.226	0.6902	-13.6414	2.02	-0.0866501	183.824	73.3333	1	0.16438	KG189cell8.abf	WT CA
-69.6109	-0.672754	-69.2752	498.973	8.46635	29.8708	19.9861	532.532	-39.4226	88.3118	48.8892	0.416	0.184	0.4972	-12.2986	1.22	-0.128421	299.401	76.6667	2	0.381955	KG193cell2.abf	WT CA
-67.7736	-53.8335	-58.6333	169.787	7.0099	111.243	22.8456	402.832	-35.0342	81.2683	46.2341	0.452	0.214	0.6136	-8.66699	1.4	-0.100698	259.067	40	1	0.428479	KG193cell8.abf	WT CA
-76.0317	-33.1353	-65.568	315.789	5.94527	39.8151	25.9873	332.642	-46.3104	71.0297	24.7192	0.45	0.226	0.604	0.488281	1.28	-0.165488	297.619	73.3333	5	0.430168	KG193cell9.abf	WT CA
-69.642	-1.60468	-69.1578	301.797	10.1845	40.0192	42.3821	422.974	-41.5405	81.9153	40.3748	0.455	0.205	0.59	-9.73511	1.35	-0.229973	317.46	110	1	0.194941	KG19cell1.abf	WT CA
-71.5907	-1.21893	-70.9907	492.195	23.9636	29.2856	41.2271	271.606	-42.0532	72.2656	30.2124	0.51	0.28	0.6035	-9.97925	1.55	-0.0428662	206.186	80	2	0.356704	KG20cell1.abf	WT CA
-70.9439	-1.23459	-70.6141	267.151	20.9506	59.821	13.1296	468.14	-42.9016	85.5042	42.6025	0.435	0.195	0.562	-10.1624	1.3	-0.191204	322.581	86.6667	1	0.295595	KG20cell4.abf	WT CA
-69.0661	-1.24557	-68.8207	197.082	12.6604	89.737	12.7244	478.516	-39.0625	83.3435	44.281	0.45	0.18	0.5235	-10.0098	1.45	-0.0905526	333.333	76.6667	1	0.474137	KG20cell6.abf	WT CA
-70.0168	24.3921	-79.7232	397.935	4.94319	51.417	46.1525	535.583	-45.6604	76.6357	30.9753	0.416	0.152	0.3914	-14.4653	1.02	-0.0735868	219.298	86.6667	1	0.289077	KG21cell4.abf	WT CA
-70.6294	12.0624	-73.3126	222.444	13.4799	90.6727	19.5451	291.748	-35.4004	61.9812	26.5808	0.475	0.22	0.5565	-13.1836	1.35	-0.0846624	224.719	66.6667	1	0.250669	KG32cell2.abf	WT CA
-69.3094	-28.317	-54.9849	505.861	14.0206	29.4931	19.1172	341.797	-40.5151	74.054	33.5388	0.495	0.23	0.5625	-14.8926	1.45	-0.199016	222.222	63.3333	1	0.394565	KG32cell3.abf	WT CA
-71.2496	-2.34412	-70.6421	259.195	10.4522	60.1196	18.0079	322.266	-40.3381	75.2502	34.9121	0.52	0.245	0.6705	-14.8621	1.7	-0.0299565	194.175	46.6667	1	0.359044	KG32cell6.abf	WT CA
-70.6233	-23.7897	-57.1756	565.274	17.7076	10.1443	17.1382	489.502	-43.4937	85.9436	42.45	0.42	0.18	0.4555	-15.3198	1.4	-0.068926	215.054	106.667	1	0.156134	KG35cell4.abf	WT CA
-69.0653	-3.65958	-67.5999	400.43	23.9701	29.2855	57.0824	392.456	-45.6482	76.4099	30.7617	0.41	0.205	0.4985	-8.23975	1.35	-0.0879193	327.869	126.667	1	0.233141	KG36cell1.abf	WT CA
-71.1915	-10.9819	-64.7262	588.721	18.4511	19.4491	29.8608	559.082	-46.1975	87.4573	41.2598	0.37	0.17	0.4045	-13.4888	1.15	-0.097213	307.692	173.333	1	0.166228	KG36cell4.abf	WT CA
-71.3489	-10.2811	-67.7667	348.425	4.52302	29.8777	51.1166	523.376	-42.5354	88.3423	45.8069	0.394	0.18	0.5348	-13.031	1.34	-0.209811	253.807	96.6667	1	0.223441	KG59cell3.abf	WT CA
-71.4377	-0.601501	-71.3276	183.053	12.0983	80.5792	13.9423	410.461	-39.8682	73.1934	33.3252	0.388	0.184	0.462	-12.5732	1.06	-0.213395	242.718	70	2	0.327164	KG59cell5.abf	WT CA
-70.6395	-2.06693	-70.0677	276.646	3.81255	40.455	19.934	512.695	-47.644	87.6831	40.0391	0.394	0.182	0.487	-4.3335	1.08	-0.0625802	277.778	96.6667	1	0.226774	KG62cell1_20pasteps.abf	WT CA
-69.8519	-14.0037	-64.3287	394.409	11.2936	50.3972	34.1654	282.288	-37.8723	62.3779	24.5056	0.452	0.232	0.5854	-5.12695	1.34	-0.0478393	270.27	96.6667	4	0.42181	KG69cell3.abf	WT CA
-70.8581	-6.91702	-69.0355	263.488	4.84781	50.4276	37.9406	294.495	-42.1448	69.458	27.3132	0.492	0.246	0.709	-5.95093	1.74	-0.11191	165.563	43.3333	1	0.314432	KG70cell2.abf	WT CA
-69.2077	-67.3137	-57.1152	179.643	4.14215	90.7253	46.7611	297.546	-40.9973	57.3547	16.3574	0.418	0.198	0.6022	-5.27954	5.02	-0.113609	324.675	73.3333	1	0.374992	KG70cell4.abf	WT CA
-70.2491	-25.2109	-61.1445	361.137	4.87341	39.8411	5.95529	532.532	-45.3278	89.151	43.8232	0.482	0.182	0.5202	-7.41577	1.34	-0.151545	292.398	96.6667	1	0.345984	KG79cell2.abf	WT CA
-68.1346	-44.986	-56.5975	256.459	6.88851	40.6888	10.8481	460.815	-40.4175	79.2664	38.8489	0.388	0.176	0.3802	-15.0757	0.98	-0.57111	223.214	110	3	0.398034	KG86cell3.abf	WT CA
-70.5689	-23.3094	-58.9225	499.645	15.7195	29.3896	26.3685	381.47	-42.1997	77.1118	34.9121	0.436	0.206	0.5072	-6.34766	1.12	-0.107459	304.878	93.3333	4	0.494003	KG86cell5.abf	WT CA
-71.9291	-15.9753	-63.0592	555.226	4.0324	29.1753	22.6629	360.107	-41.6718	78.8116	37.1399	0.47	0.224	0.625	-4.5166	1.3	-0.0945204	354.61	90	2	0.308038	KG86cell6.abf	WT CA
-70.4788	-10.671	-66.8542	339.667	5.60901	29.1246	7.10104	575.256	-48.7488	94.4031	45.6543	0.428	0.168	0.3952	-15.8691	0.9	-0.226004	342.466	146.667	2	0.226389	KG87cell2.abf	WT CA
-73.3567	-0.636023	-73.2311	197.386	8.33652	89.7405	40.406	268.555	-41.8518	61.5051	19.6533	0.442	0.234	0.4578	-17.0288	4.8	-0.138687	149.254	103.333	1	0.095636	KG87cell3.abf	WT CA
-70.4143	-41.5047	-57.5685	309.501	7.66172	30.5201	16.7595	611.877	-44.1284	86.3953	42.2668	0.344	0.142	0.3814	-6.46973	5	-0.207108	322.581	80	1	0.255633	KG94cell3.abf	WT CA
-71.8513	-1.82424	-71.3978	248.615	4.65399	59.8355	23.7967	492.859	-43.4875	86.1206	42.6331	0.384	0.182	0.4624	-9.3689	1.22	-0.114409	301.205	96.6667	1	0.210947	KG95cell2.abf	WT CA
-70.2726	-12.2072	-65.7517	370.345	12.9563	29.2963	22.9097	371.704	-45.7031	78.3875	32.6843	0.495	0.22	0.565	-10.8643	1.45	-0.213011	183.486	50	2	0.569563	KG10cell2.abf	WT IS
-70.6083	0.606567	-70.9658	589.462	22.9748	9.76794	29.1873	483.398	-51.5442	95.5811	44.0369	0.45	0.2	0.516	-10.3455	1.15	-0.328549	263.158	60	2	0.521292	KG11cell4.abf	WT IS
-68.601	-20.1407	-57.9548	528.594	24.3752	20.1377	42.896	416.26	-46.6919	79.9255	33.2336	0.4	0.19	0.3355	-18.5547	0.8	-0.589624	289.855	50	1	1.53806	KG11cell5.abf	WT IS
-68.1637	-3.01497	-67.5604	200.086	6.10238	101.603	37.7344	389.099	-40.2649	71.0266	30.7617	0.378	0.186	0.4682	-15.2893	1.66	-0.101932	95.2381	56.6667	1	0.247603	KG13Cell1.abf	WT IS
-71.2098	5.68339	-73.6606	431.217	9.06301	40.4241	17.6762	424.194	-37.1857	77.1027	39.917	0.45	0.19	0.5652	-13.1836	2.16	-0.120441	86.0585	23.3333	1	0.750122	KG145cell5.abf	WT IS
-71.0237	-14.1406	-67.6488	238.661	9.54314	50.3686	10.1903	563.049	-40.5273	90.332	49.8047	0.424	0.168	0.4338	-9.97925	1	-0.41551	260.417	56.6667	4	0.816617	KG145cell8.abf	WT IS
-68.4656	-1.53817	-67.451	659.664	5.65727	29.8406	24.7782	369.263	-42.8284	89.1846	46.3562	0.538	0.288	0.6004	-12.1155	1.54	-0.0996079	195.313	83.3333	1	0.222104	KG148cell1.abf	WT IS
-72.9814	-13.68	-63.3681	702.725	5.52999	19.9828	15.8074	581.36	-46.5637	107.172	60.6079	0.456	0.206	0.5874	-11.6272	1.54	-0.155721	238.095	136.667	2	0.223336	KG148cell2.abf	WT IS
-70.533	-10.5771	-63.3717	677.064	5.47776	19.817	29.8686	401.306	-42.3523	91.6687	49.3164	0.476	0.236	0.595	-10.2539	1.48	-0.0844047	241.546	96.6667	4	0.338408	KG148cell3.abf	WT IS
-70.1839	3.7556	-71.8563	445.297	9.35014	19.8119	22.6629	440.979	-46.3715	83.9386	37.5671	0.41	0.194	0.4604	-12.4207	1.2	-0.265822	294.118	70	1	0.536519	KG148cell4.abf	WT IS
-72.2536	-124.544	-52.9458	155.028	3.67922	70.6546	21.3647	540.161	-45.874	90.979	45.105	0.394	0.182	0.5418	-8.08716	1.46	-0.298902	220.264	46.6667	1	0.540735	KG148cell5.abf	WT IS
-73.0572	-15.0622	-69.797	216.446	10.8678	40.2991	16.7595	492.859	-46.2952	84.0454	37.7502	0.404	0.176	0.4544	-11.7798	1.18	-0.588613	215.517	56.6667	4	0.652161	KG148cell6.abf	WT IS
-65.3973	14.9577	-70.8161	362.273	18.3799	50.5606	20.0441	404.358	-37.2314	80.8411	43.6096	0.464	0.21	0.6334	-7.38525	1.56	-0.145409	290.698	76.6667	2	0.371411	KG162cell4.abf	WT IS
-68.5339	6.8503	-70.5617	296.014	5.57964	111.399	19.934	228.882	-39.3738	61.6821	22.3084	0.554	0.28	0.8262	-3.41797	5.02	-0.0781119	248.756	43.3333	1	0.410478	KG163cell1.abf	WT IS
-73.4888	-23.2797	-68.0044	235.588	5.4689	90.6504	6.23802	450.134	-43.1946	87.6587	44.4641	0.488	0.206	0.6784	-3.23486	1.46	-0.0762788	299.401	56.6667	2	0.519292	KG163cell11.abf	WT IS
-68.1062	-19.1556	-63.8004	224.78	5.6751	49.8107	10.0901	492.859	-39.6545	86.5601	46.9055	0.428	0.186	0.559	-10.1318	1.52	-0.785498	207.469	43.3333	3	0.733718	KG163cell2.abf	WT IS
-67.6181	12.408	-73.2452	453.507	5.95686	40.6783	8.16408	352.478	-41.2415	75.8179	34.5764	0.488	0.228	0.5866	-6.31714	1.38	-0.110425	232.558	66.6667	1	0.304327	KG163cell5.abf	WT IS
-67.4911	-44.4109	-51.4922	360.248	4.44105	50.6172	11.5824	337.219	-40.9607	77.3071	36.3464	0.494	0.236	0.641	-6.19507	1.52	-0.552033	261.78	63.3333	3	0.803471	KG163cell6.abf	WT IS
-68.4662	-16.8177	-64.7994	218.03	4.5592	110.77	10.5389	415.039	-35.4004	78.9795	43.5791	0.424	0.192	0.511	-10.3455	1.32	-0.107396	316.456	40	1	0.7607	KG164cell6.abf	WT IS
-66.1626	9.67189	-71.4491	546.584	11.3661	50.4207	38.9529	294.495	-41.2598	72.6013	31.3416	0.492	0.264	0.6102	-6.62231	1.38	-0.310478	316.456	73.3333	2	0.326131	KG164cell7.abf	WT IS
-72.3382	-0.370239	-72.1781	432.277	24.387	30.7163	27.7794	226.44	-34.8206	62.5305	27.71	0.55	0.285	0.7745	-5.43213	1.95	-0.284051	219.78	6.66667	3	0.671352	KG168cell1.abf	WT IS
-62.7867	5.72437	-65.8539	535.808	17.0496	39.8575	33.8529	309.448	-42.3889	73.4863	31.0974	0.5	0.24	0.703	-2.47192	1.65	-0.188195	229.885	53.3333	2	0.45041	KG168cell2.abf	WT IS
-71.5279	-15.179	-66.979	299.681	21.0879	50.7059	13.083	378.418	-35.9802	70.5261	34.5459	0.424	0.194	0.5278	-7.20215	1.3	-0.231833	284.091	73.3333	4	0.672685	KG168cell3.abf	WT IS
-67.4009	3.83611	-68.6098	315.128	8.54394	50.4484	27.512	299.072	-37.5793	74.0479	36.4685	0.502	0.25	0.6266	-12.3291	1.62	-0.129109	131.579	60	1	0.476411	KG170cell1.abf	WT IS
-72.8646	-29.3988	-62.7186	345.115	6.12552	49.815	17.1678	312.805	-35.8582	72.876	37.0178	0.484	0.238	0.674	-9.15527	1.6	-0.158346	193.798	66.6667	1	0.604974	KG170cell4.abf	WT IS
-70.184	-4.64346	-67.6583	543.919	5.42062	29.8594	23.3287	350.952	-38.9709	74.0051	35.0342	0.444	0.216	0.6092	-12.9089	5	-0.0513266	220.264	73.3333	1	0.22533	KG170cell6.abf	WT IS
-66.6828	-24.3886	-57.2313	387.539	6.4437	70.4584	13.4749	347.9	-32.3486	78.2166	45.8679	0.504	0.238	0.6948	-4.39453	1.6	-0.139862	310.559	36.6667	1	0.542765	KG172cell3.abf	WT IS
-71.7022	-51.2142	-63.9762	150.856	11.3604	91.1564	12.0162	363.159	-37.0911	68.7073	31.6162	0.408	0.19	0.4554	-7.20215	1.06	-0.832267	274.725	6.66667	3	0.851085	KG172cell4.abf	WT IS
-65.9357	-63.6517	-43.1593	357.828	4.11364	60.6794	15.972	486.755	-41.6931	86.2183	44.5251	0.394	0.19	0.3712	-17.3035	0.98	-0.463752	224.215	136.667	8	0.498118	KG172cell6.abf	WT IS
-68.1701	-28.0917	-62.5705	199.331	13.5512	90.5688	21.7687	491.333	-37.4695	86.6638	49.1943	0.396	0.186	0.4756	-8.36182	1.12	-0.250384	314.465	36.6667	3	0.657601	KG184cell2.abf	WT IS
-72.9846	-18.209	-66.9298	332.518	7.8067	39.7991	14.6181	456.238	-38.4033	79.4189	41.0156	0.442	0.19	0.4884	-10.2234	1.56	-0.314367	102.041	50	2	0.356115	KG184cell3.abf	WT IS
-73.1381	3.20572	-74.3664	383.157	5.06387	50.5886	16.6373	471.497	-40.8691	84.1736	43.3044	0.414	0.196	0.4492	-12.9089	1.24	-0.131384	253.807	70	1	0.401808	KG185cell3.abf	WT IS
-69.2854	-66.5038	-55.8768	201.623	2.96724	111.382	12.8209	436.401	-42.6086	76.0254	33.4167	0.414	0.188	0.5454	-11.1389	1.34	-0.0869506	162.338	33.3333	1	0.743061	KG185cell4.abf	WT IS
-71.218	-41.7916	-62.9406	198.065	4.98074	70.4419	15.1558	389.099	-39.4226	78.8208	39.3982	0.456	0.212	0.4904	-11.9324	1.18	-0.773038	196.078	3.33333	4	1.05374	KG185cell7.abf	WT IS
-72.3081	-19.1708	-66.818	286.38	5.18191	50.5167	27.512	334.167	-42.157	71.3928	29.2358	0.442	0.226	0.534	-5.43213	1.14	-0.602012	303.03	20	8	1.10314	KG185cell9.abf	WT IS
-70.9751	-26.1707	-64.2714	256.153	8.95748	70.6405	9.20178	585.938	-40.7227	86.9568	46.2341	0.388	0.162	0.3542	-12.8174	0.82	-0.252762	306.748	93.3333	8	0.536711	KG188cell6.abf	WT IS
-67.0333	-13.6392	-64.4957	186.049	4.37725	110.707	11.5824	251.77	-31.5918	63.1775	31.5857	0.534	0.264	0.7602	-10.376	2.06	-0.142503	85.3242	33.3333	1	0.342459	KG189cell10.abf	WT IS
-67.8753	-45.7282	-54.6762	288.642	5.83621	70.531	12.0162	457.764	-36.1755	78.0151	41.8396	0.408	0.188	0.4828	-6.31714	1.04	-0.198782	308.642	73.3333	5	0.811341	KG189cell2.abf	WT IS
-68.3319	-0.762598	-67.9024	563.213	10.4481	29.8654	30.8246	297.546	-41.8213	71.3623	29.541	0.498	0.254	0.6726	-4.30298	1.54	-0.0350909	263.158	76.6667	5	0.461825	KG189cell4.abf	WT IS
-69.5223	-19.5167	-63.2661	320.555	8.07081	49.7911	17.3026	273.132	-30.188	67.3889	37.2009	0.534	0.264	0.781	-11.8408	4.96	-0.0377777	163.934	13.3333	1	0.577709	KG189cell9.abf	WT IS
-69.5226	-2.70172	-68.2792	460.247	20.9149	30.0112	20.0441	428.772	-38.3911	81.0852	42.6941	0.424	0.202	0.4772	-10.437	1.2	-0.192755	285.714	70	4	0.804577	KG193cell1.abf	WT IS
-73.522	-33.5291	-66.7037	203.353	5.07657	70.4611	13.4749	595.093	-44.6167	91.0645	46.4478	0.384	0.168	0.4786	-7.78198	1.2	-0.170104	274.725	66.6667	1	0.444007	KG193cell3.abf	WT IS
-65.1762	-4.11838	-64.558	150.107	5.58564	131.418	16.7595	469.971	-36.1633	83.2825	47.1191	0.424	0.19	0.6028	-6.16455	1.58	-0.124073	303.03	46.6667	2	0.411512	KG193cell6.abf	WT IS
-70.1538	0	-70.1538	331.903	47.7048	50	28.9548	588.989	-35.6934	77.7771	42.0837	0.372	0.144	0.3416	-18.7683	0.88	-0.722059	203.252	60	1	0.506581	KG19Cell3.abf	WT IS
-71.1556	0	-71.1556	335.265	10	70	3.2953	373.84	-41.7267	61.7767	20.05	0.466	0.192	0.434	-9.42993	1.3	-0.454498	308.642	6.66667	1	0.824948	KG19cell2.abf	WT IS
-69.9419	-1.22751	-69.4643	389.1	16.9831	39.6937	36.2047	412.598	-39.6729	78.8269	39.1541	0.4	0.19	0.4885	-6.073	1.25	-0.234153	281.69	0	4	0.633254	KG20cell3.abf	WT IS
-70.4528	-1.23489	-70.094	290.505	16.6393	59.8159	22.779	368.652	-40.1978	70.7153	30.5176	0.39	0.185	0.4035	-13.855	1	-0.157412	363.636	93.3333	1	0.717072	KG20cell5.abf	WT IS
-69.3759	-1.22946	-69.1074	218.372	12.6175	99.9291	32.6683	443.115	-41.6443	80.6763	39.032	0.43	0.2	0.5405	-6.53076	1.35	-0.129419	298.507	36.6667	1	0.651962	KG20cell7.abf	WT IS
-69.2643	-1.22696	-68.9141	285.451	11.3562	69.6058	39.8874	492.554	-45.7764	88.562	42.7856	0.405	0.19	0.4595	-9.58252	1.4	-0.116705	370.37	73.3333	1	0.677344	KG20cell8.abf	WT IS
-69.7176	3.49825	-71.3884	477.63	4.0039	30.4538	24.6875	601.196	-46.4478	86.4868	40.0391	0.504	0.174	0.414	-10.5286	4.82	-0.0652884	187.97	43.3333	1	0.386114	KG21cell2.abf	WT IS
-68.4239	-44.4871	-47.1911	477.279	10.256	30.8418	31.0467	311.279	-42.9901	76.6815	33.6914	0.495	0.265	0.452	-18.8599	1.15	-0.068841	238.095	156.667	1	0.445651	KG31cell1.abf	WT IS
-71.3073	-3.75751	-70.3405	257.3	12.9188	59.8982	18.717	407.104	-46.0052	79.9103	33.905	0.445	0.21	0.453	-9.0332	1.05	-0.15801	322.581	63.3333	1	1.04689	KG31cell2.abf	WT IS
-70.4343	-3.8042	-69.8935	142.181	7.16698	100.133	11.4787	507.812	-43.1976	86.8988	43.7012	0.395	0.175	0.431	-11.9019	1	-0.172413	338.983	83.3333	3	0.520838	KG31cell3.abf	WT IS
-70.9981	-13.4637	-62.1566	656.695	20.0848	19.3038	14.9796	404.053	-44.0308	80.1025	36.0718	0.435	0.2	0.3775	-16.6626	1	-0.226364	277.778	163.333	12	0.822249	KG31cell4.abf	WT IS
-67.927	-26.2371	-57.8965	382.304	9.6783	29.4191	36.3917	405.273	-41.4978	82.605	41.1072	0.49	0.25	0.4365	-15.4724	1.1	-0.171013	224.719	113.333	1	0.330346	KG32cell5.abf	WT IS
-64.0336	-24.1324	-55.837	339.654	13.2895	39.359	31.515	654.297	-43.28	90.7959	47.5159	0.37	0.16	0.356	-13.031	0.95	-0.0834433	215.054	26.6667	1	0.836727	KG35cell3.abf	WT IS
-68.272	-37.8102	-57.365	288.47	13.438	50.0297	40.284	530.396	-38.4216	78.0334	39.6118	0.365	0.16	0.305	-19.5007	0.85	-0.110336	303.03	30	2	1.21497	KG36cell2.abf	WT IS
-69.0708	-15.3284	-64.4951	298.518	8.587	48.977	24.3562	530.396	-44.1162	83.728	39.6118	0.395	0.165	0.365	-11.7493	1	-0.143674	312.5	83.3333	1	0.689982	KG36cell3.abf	WT IS
-72.0513	-37.6139	-61.1634	289.465	10.3193	69.9722	58.2524	385.132	-45.5017	83.8928	38.3911	0.45	0.235	0.54	-6.5918	1.25	-0.0585333	246.914	30	1	0.62636	KG36cell5.abf	WT IS
-79.5864	-3.0478	-78.7111	287.185	9.25429	39.9082	20.5533	323.486	-41.7267	70.8099	29.0833	0.442	0.218	0.5584	-12.2375	1.42	-0.0915611	148.81	26.6667	1	0.523484	KG49_cell4.abf	WT IS
-70.8638	-44.0622	-63.5565	165.841	12.5865	70.4642	13.4402	396.729	-40.2283	70.3186	30.0903	0.374	0.18	0.41	-7.8125	0.92	-0.474205	284.091	3.33333	4	1.25186	KG59cell1.abf	WT IS
-72.4073	-27.7177	-65.8107	237.992	3.74101	60.0803	24.4375	517.273	-47.229	86.1084	38.8794	0.388	0.176	0.392	-16.6626	0.94	-0.133533	276.243	73.3333	3	0.459713	KG59cell2.abf	WT IS
-69.4948	-12.8365	-66.0894	265.292	5.66845	49.7854	26.7595	354.004	-46.9299	68.7805	21.8506	0.396	0.196	0.4634	-4.36401	1.08	-0.383364	318.471	60	2	1.02028	KG61cell5_20pasteps.abf	WT IS
-68.6084	0	-68.6084	253.306	5.73144	60	24.4375	300.598	-44.3909	61.8164	17.4255	0.448	0.212	0.6446	-9.91821	5	-0.111605	210.97	60	1	0.191186	KG69cell1.abf	WT IS
-68.9106	-30.2138	-60.7439	270.295	10.822	39.8335	28.3394	291.443	-39.6423	62.1033	22.4609	0.452	0.22	0.6444	-6.95801	1.64	-0.353006	174.216	50	3	0.58066	KG69cell4.abf	WT IS
-68.9643	-20.8139	-62.4319	313.845	3.73037	49.7868	24.5258	245.667	-39.1052	57.8125	18.7073	0.458	0.238	0.5554	-10.7422	1.42	-0.291685	199.203	20	3	1.17505	KG69cell5.abf	WT IS
-63.2342	-2.33666	-62.1845	449.239	4.30033	19.8514	46.4693	271.606	-41.9769	54.8553	12.8784	0.414	0.21	0.524	-7.1106	1.52	-0.136418	250	16.6667	5	0.850126	KG70cell1.abf	WT IS
-70.4712	-1.64341	-69.8033	406.403	6.67976	29.8538	14.2111	546.265	-41.6016	84.3567	42.7551	0.414	0.164	0.3944	-13.5498	0.86	-0.161755	318.471	116.667	7	0.446454	KG79cell1.abf	WT IS
-70.5742	-31.3666	-65.1552	172.764	6.11431	110.62	9.07967	512.695	-40.5701	87.384	46.814	0.408	0.178	0.5666	-5.79834	1.5	-0.244535	243.902	33.3333	2	0.464726	KG79cell3.abf	WT IS
-70.0716	-36.3257	-56.5657	371.801	7.50263	30.8223	14.6413	448.608	-39.0686	78.772	39.7034	0.414	0.18	0.4104	-13.3667	1.04	-0.206652	253.807	46.6667	4	0.661607	KG86cell1.abf	WT IS
-68.1377	-1.80486	-66.5961	854.12	6.51188	9.66164	26.6019	360.107	-44.3878	80.2765	35.8887	0.47	0.228	0.5662	-9.52148	1.48	-0.0661863	182.482	66.6667	1	0.438279	KG86cell2.abf	WT IS
-70.1435	-40.2924	-61.94	203.598	4.65684	80.5597	5.2275	526.428	-39.4104	91.0461	51.6357	0.428	0.178	0.469	-13.3362	1.04	-0.10536	304.878	63.3333	1	0.309788	KG87cell1.abf	WT IS
-69.7708	-0.626819	-69.5752	311.956	6.72066	59.8188	13.1599	462.341	-43.5608	86.2244	42.6636	0.428	0.19	0.5666	-5.31006	1.2	-0.104675	373.134	66.6667	3	0.509665	KG87cell4.abf	WT IS
-72.1588	9.13318	-73.933	194.26	5.15441	60.4441	10.0901	514.221	-47.5281	81.189	33.6609	0.348	0.158	0.3426	-12.5732	0.78	-0.175475	381.679	110	2	0.348079	KG95cell1.abf	WT IS
-71.8622	-24.3944	-65.5617	258.278	7.4947	39.2081	10.1903	474.548	-42.8772	81.5125	38.6353	0.404	0.172	0.3904	-12.8784	1	-0.617175	213.675	73.3333	2	0.318565	KG95cell4.abf	WT IS
-71.2491	-77.4751	-55.6512	201.328	3.48312	89.914	16.6373	367.737	-45.5994	65.4968	19.8975	0.374	0.178	0.3882	-8.97217	0.9	-0.110449	393.701	73.3333	1	0.907026	KG95cell5.abf	WT IS
-72.0818	-51.3955	-59.1399	251.809	11.6982	49.2374	21.4122	512.695	-43.7256	81.6895	37.9639	0.356	0.162	0.3286	-13.9465	0.76	-0.161517	357.143	93.3333	2	0.465905	KG95cell6.abf	WT IS
-70.1306	-24.37	-66.6102	144.455	6.20112	110.307	24.4375	471.497	-42.1021	75.6714	33.5693	0.408	0.164	0.426	-10.3149	1.16	-0.350451	98.6193	13.3333	1	0.43022	KG95cell7.abf	WT IS
